# Supplementary material
Source: publisher figshare collection journal article supplement (https://springernature.figshare.com/ndownloader/files/21078222)
Supplement: Supplementary file 1 [file 21078222]

## Sheet: Figure 1d
Figure 1d
	IFN-γ SFU/106cells
	Steady-state LCs		Migrated LCs
	unpulsed	tet-EBV peptide	unpulsed	tet-EBV peptide
	140	340	640	1420
	100	240	380	680
	240	220	1340	1200
	20	20	180	1380
	80	80	520	1360
	20	60	280	1180
	60	100	720	2280
			540	2380
			620	2580

## Sheet: Figure 1e
Figure 1e
		IFN-γ SFU/106cells - background
		Migrated LCs
		Medium			TNF
		1500	2125	1725	3875	3500	3825
		1286.67	926.667	1346.67	1653.33	1753.33	1953.33
		60	-20	220	1053.33	1033.33	853.333
		1793.33	1533.33	1513.33	1913.33	2373.33	2173.33
		433.333	773.333	1213.33	853.333	1773.33	1353.33

## Sheet: Figure 2a
Figure 2a		>103	>102	>101	>100	<100
		12206.6	971	99.94	9.99	0.99
		12085.3	964.43	99.86	9.99	0.99
		10968.2	953.59	99.81	9.99	0.99
		7505.86	912.6	99.76	9.99	0.99
		7416.22	905.55	99.45	9.98	0.99
		5788.04	898.21	99.09	9.98	0.99
		5735.74	892.1	98.81	9.97	0.99
		4556.14	876.84	98.65	9.97	0.99
		4543.12	852.62	98.45	9.97	0.99
		3822.18	845.3	98.29	9.97	0.99
		3793.84	844.65	98.26	9.96	0.99
		3164.33	842.4	98.04	9.96	0.99
		3003.18	826.82	97.86	9.96	0.99
		2637.31	824	97.64	9.96	0.99
		2320.66	817.37	97.59	9.96	0.98
		2294.66	801.44	97.52	9.95	0.98
		2285.74	792.56	97.45	9.95	0.98
		2053.44	791.85	97.37	9.95	0.98
		1937.79	788.77	97.22	9.94	0.98
		1887.03	785.13	97.06	9.94	0.98
		1768.43	780.09	96.68	9.94	0.98
		1726.71	774.1	96.54	9.94	0.98
		1677.41	763.84	96.38	9.94	0.98
		1503.11	749.22	96.37	9.93	0.98
		1440.96	740.59	96	9.93	0.98
		1362.6	731.44	95.95	9.93	0.98
		1263.43	725.6	95.84	9.92	0.98
		1177.7	700.44	95.72	9.92	0.98
		1177.18	698.61	95.71	9.92	0.98
		1157.72	697.36	95.69	9.92	0.98
		1151.47	694.11	95.51	9.91	0.98
		1134.98	683.24	95.47	9.91	0.98
		1125.05	678.32	95.45	9.91	0.97
		1124.56	673.83	95.39	9.91	0.97
		1105.1	655.24	94.7	9.9	0.97
		1087.6	636.42	94.42	9.9	0.97
			632.92	94.15	9.9	0.97
			629.34	93.88	9.9	0.97
			628.84	93.8	9.89	0.97
			625.45	93.79	9.89	0.97
			624.86	93.61	9.89	0.97
			619.1	93.46	9.88	0.97
			618.56	92.84	9.88	0.97
			618.43	92.57	9.88	0.97
			610.5	92.53	9.87	0.96
			607.59	92.52	9.87	0.96
			607.59	92.3	9.87	0.96
			603.5	92.28	9.87	0.96
			601.44	91.91	9.86	0.96
			599.3	91.72	9.86	0.96
			597.85	91.56	9.86	0.96
			596.8	90.7	9.86	0.96
			591.83	90.65	9.86	0.96
			589.1	90.51	9.86	0.96
			588.17	90.42	9.86	0.96
			587.75	90.19	9.86	0.96
			587.04	90	9.84	0.96
			576.51	89.73	9.84	0.96
			573.66	89.72	9.84	0.96
			571.33	89.71	9.84	0.96
			570.89	89.66	9.84	0.96
			570.03	89.61	9.84	0.96
			569.8	89.55	9.84	0.96
			569.62	89.51	9.83	0.96
			568.53	89.12	9.81	0.96
			566.45	88.78	9.81	0.96
			560.71	88.74	9.81	0.96
			554.74	88.71	9.8	0.96
			554.19	88.68	9.79	0.96
			540.44	88.55	9.79	0.96
			529.34	88.41	9.79	0.95
			519.78	88.35	9.79	0.95
			515.26	88.03	9.79	0.95
			514.73	87.83	9.78	0.95
			511.97	87.8	9.78	0.95
			507.71	87.59	9.78	0.95
			504.89	87.59	9.77	0.95
			503.59	87.54	9.77	0.95
			502.91	87.27	9.76	0.95
			501.19	87	9.76	0.95
			499.16	86.98	9.76	0.95
			497.32	86.72	9.76	0.95
			495.3	86.56	9.75	0.95
			490.5	86.5	9.75	0.95
			490.44	86.46	9.75	0.95
			483.11	86.33	9.75	0.95
			482.95	86.3	9.75	0.95
			482.37	85.51	9.75	0.95
			477.18	85.4	9.74	0.95
			473.94	85.35	9.74	0.95
			473.94	85.3	9.74	0.94
			472.5	84.96	9.74	0.94
			470.14	84.78	9.74	0.94
			455.35	84.75	9.73	0.94
			453.9	84.71	9.73	0.94
			450.49	84.7	9.73	0.94
			447.43	84.69	9.72	0.94
			443.58	84.63	9.72	0.94
			443.07	84.45	9.72	0.94
			433.21	84.43	9.72	0.94
			432.58	84.37	9.72	0.94
			419.04	84.09	9.72	0.94
			416.85	84.02	9.71	0.94
			412.52	84.01	9.71	0.94
			412.27	83.84	9.71	0.94
			410.45	83.83	9.71	0.94
			408.5	83.78	9.7	0.94
			406.66	83.75	9.69	0.94
			405.86	83.71	9.69	0.94
			402.55	83.7	9.69	0.94
			396.66	83.69	9.68	0.93
			396.07	83.65	9.68	0.93
			394.02	83.63	9.68	0.93
			393.26	83.56	9.68	0.93
			391.12	83.55	9.68	0.93
			390.8	83.4	9.68	0.93
			389.62	83.23	9.67	0.93
			386.48	82.34	9.67	0.93
			385.64	82.25	9.67	0.93
			383.38	82.19	9.67	0.93
			380.5	81.99	9.66	0.93
			378.76	81.9	9.66	0.93
			377.42	81.83	9.65	0.93
			377.31	81.81	9.65	0.92
			375.77	81.6	9.64	0.92
			375.54	81.5	9.64	0.92
			374.68	81.45	9.64	0.92
			373.76	81.32	9.63	0.92
			368.19	81.17	9.63	0.92
			365.73	81.15	9.63	0.92
			356.27	80.92	9.63	0.92
			351.48	80.89	9.63	0.92
			350.86	80.8	9.62	0.92
			349.83	80.75	9.62	0.92
			348.55	80.62	9.62	0.92
			347.91	80.55	9.62	0.92
			344.52	80.46	9.62	0.92
			341.32	80.21	9.62	0.92
			338.54	80.13	9.61	0.92
			335.35	80.02	9.61	0.92
			334.38	79.88	9.61	0.91
			332.49	79.87	9.6	0.91
			331.71	79.86	9.6	0.91
			329.45	79.79	9.59	0.91
			329.01	79.57	9.59	0.91
			328.26	79.39	9.59	0.91
			327.31	79.37	9.58	0.91
			318.81	79.25	9.58	0.91
			318.79	78.99	9.58	0.91
			316.36	78.67	9.57	0.91
			314.45	78.67	9.57	0.91
			312.7	78.67	9.57	0.91
			312.53	78.34	9.57	0.91
			311.64	78.11	9.57	0.91
			308.17	77.96	9.57	0.91
			307.5	77.93	9.56	0.91
			307.32	77.85	9.55	0.91
			307.1	77.82	9.55	0.91
			304.72	77.77	9.55	0.91
			304.01	77.74	9.54	0.91
			303.59	77.64	9.54	0.9
			302.32	77.64	9.54	0.9
			301.6	77.59	9.54	0.9
			301.45	77.45	9.53	0.9
			300.92	77.41	9.53	0.9
			299.55	77.26	9.53	0.9
			297.03	77.23	9.53	0.9
			294.07	77.21	9.53	0.9
			293.99	77.21	9.53	0.9
			292.79	77.14	9.53	0.9
			290.6	77.07	9.52	0.9
			290.53	77.05	9.51	0.9
			290.45	76.67	9.51	0.9
			285.99	76.46	9.5	0.9
			285.53	76.36	9.5	0.89
			282.84	76.33	9.49	0.89
			282.46	76.3	9.49	0.89
			282.35	76.27	9.49	0.89
			280.32	76.27	9.48	0.89
			279.07	76.1	9.48	0.89
			277.65	76.1	9.48	0.89
			275.51	76.09	9.48	0.89
			275.33	76.04	9.48	0.89
			274.03	75.93	9.48	0.89
			270.62	75.8	9.47	0.89
			268.27	75.78	9.47	0.89
			267.57	75.76	9.46	0.89
			266.96	75.72	9.46	0.89
			266.8	75.69	9.45	0.89
			266.75	75.46	9.45	0.89
			266.34	75.45	9.44	0.89
			266.32	75.23	9.44	0.88
			265.69	75.16	9.44	0.88
			265.36	75.13	9.44	0.88
			263.89	75.09	9.43	0.88
			263.86	75.05	9.43	0.88
			262.93	74.83	9.43	0.88
			261.75	74.34	9.43	0.88
			260.21	74.33	9.43	0.88
			255.9	74.29	9.42	0.88
			255.58	74.17	9.41	0.88
			255.17	73.91	9.41	0.88
			252.18	73.9	9.41	0.88
			246.39	73.86	9.41	0.88
			246.27	73.83	9.4	0.88
			245.77	73.75	9.4	0.88
			245.43	73.71	9.4	0.88
			244.37	73.47	9.4	0.88
			244.32	73.45	9.4	0.88
			243.71	73.3	9.39	0.87
			243.54	73.28	9.39	0.87
			243.27	73.2	9.39	0.87
			242.88	73.13	9.39	0.87
			242.26	73.1	9.39	0.87
			240.52	73.04	9.38	0.87
			239.17	73.01	9.38	0.87
			237.16	72.98	9.38	0.87
			234.35	72.95	9.38	0.87
			233.82	72.85	9.38	0.87
			233.7	72.83	9.37	0.87
			233.51	72.82	9.37	0.87
			233.16	72.73	9.37	0.87
			232.35	72.44	9.36	0.87
			231.51	72.42	9.36	0.87
			231.3	72.37	9.35	0.87
			229.71	72.35	9.35	0.87
			228.03	72.32	9.35	0.87
			227.49	72.3	9.35	0.87
			225.56	72.16	9.34	0.87
			225.35	71.76	9.34	0.87
			224.97	71.75	9.34	0.87
			224.11	71.65	9.34	0.86
			223.2	71.31	9.33	0.86
			222.95	71.25	9.33	0.86
			222.05	71.19	9.33	0.86
			221.01	71.14	9.33	0.86
			219.93	70.7	9.33	0.86
			219.28	70.67	9.32	0.86
			218.94	70.67	9.32	0.86
			217.77	70.55	9.32	0.86
			217.34	70.46	9.32	0.86
			216.37	70.42	9.31	0.86
			215.22	70.42	9.31	0.86
			215.03	70.35	9.31	0.86
			214.68	70.19	9.31	0.86
			212.53	70.18	9.3	0.86
			211.3	70.07	9.3	0.85
			211.26	70.07	9.3	0.85
			210.43	70.02	9.29	0.85
			209.36	69.92	9.29	0.85
			208.53	69.85	9.29	0.85
			208.01	69.84	9.29	0.85
			205.77	69.7	9.27	0.85
			205.22	69.67	9.27	0.85
			204.65	69.6	9.26	0.85
			203.98	69.59	9.25	0.85
			203.7	69.5	9.25	0.85
			203.36	69.5	9.24	0.85
			201.61	69.43	9.23	0.85
			199.66	69.36	9.23	0.85
			199.59	69.18	9.22	0.85
			198.55	69.13	9.22	0.85
			198.53	69.09	9.21	0.85
			198.25	69.03	9.21	0.85
			198.22	68.96	9.21	0.85
			198.16	68.83	9.2	0.85
			197.27	68.83	9.2	0.85
			196.42	68.82	9.19	0.85
			195.61	68.7	9.19	0.84
			194.18	68.58	9.19	0.84
			193.97	68.53	9.19	0.84
			191.53	68.49	9.19	0.84
			191.48	68.41	9.19	0.84
			191.24	68.4	9.19	0.84
			191.08	68.39	9.18	0.84
			190.63	68.38	9.18	0.84
			190.22	68.29	9.17	0.84
			190.09	68.27	9.17	0.84
			189.8	68.17	9.17	0.84
			189.68	68.13	9.16	0.84
			189.59	68.09	9.16	0.84
			188.28	68.09	9.16	0.84
			188.11	68.02	9.16	0.84
			185.22	68.01	9.15	0.84
			184.05	67.95	9.15	0.84
			183.27	67.72	9.15	0.84
			183.06	67.71	9.14	0.84
			179.96	67.71	9.14	0.83
			179.94	67.71	9.14	0.83
			179.89	67.69	9.13	0.83
			179.06	67.52	9.13	0.83
			178.97	67.29	9.13	0.83
			178.86	67.26	9.13	0.83
			177.59	67.24	9.13	0.83
			177.45	67.21	9.12	0.83
			176.24	67.21	9.12	0.83
			175.99	67.05	9.12	0.83
			175.85	66.88	9.12	0.83
			175.62	66.76	9.11	0.83
			175.41	66.54	9.11	0.83
			175.38	66.51	9.11	0.83
			174.94	66.51	9.11	0.83
			174.9	66.48	9.1	0.82
			174.83	66.46	9.1	0.82
			173.13	66.41	9.1	0.82
			172.91	66.4	9.1	0.82
			172.17	66.3	9.09	0.82
			169.7	66.19	9.09	0.82
			169.3	66.15	9.09	0.82
			168.96	66.11	9.08	0.82
			168.94	66.1	9.08	0.82
			168.8	65.97	9.08	0.82
			167.42	65.93	9.08	0.82
			166.86	65.85	9.08	0.82
			164.82	65.71	9.08	0.82
			163.03	65.69	9.07	0.82
			162.46	65.67	9.07	0.81
			162.15	65.63	9.07	0.81
			161.7	65.48	9.07	0.81
			159.81	65.4	9.06	0.81
			158.28	65.39	9.06	0.81
			158.15	65.36	9.06	0.81
			157.65	65.29	9.06	0.81
			157.52	65.24	9.06	0.81
			155.61	65.23	9.05	0.81
			155.28	65.13	9.05	0.81
			154.99	65.12	9.05	0.81
			154.23	65.09	9.05	0.81
			153.78	64.9	9.04	0.81
			152.85	64.76	9.04	0.81
			152.3	64.72	9.04	0.81
			152.13	64.69	9.04	0.81
			152.04	64.55	9.03	0.81
			151.88	64.53	9.02	0.81
			151.68	64.44	9.02	0.81
			150.44	64.17	9.02	0.81
			149.76	64.16	9.02	0.81
			149.58	64.08	9.02	0.81
			149.51	64.08	9.02	0.81
			149.32	64	9.02	0.81
			149.01	63.99	9.02	0.81
			148.08	63.96	9.02	0.8
			148.02	63.95	9.01	0.8
			147.87	63.92	9.01	0.8
			147.79	63.84	9	0.8
			147.13	63.8	9	0.8
			147.01	63.79	9	0.8
			146.9	63.73	9	0.8
			146.78	63.49	9	0.8
			146.54	63.39	9	0.8
			146.01	63.34	9	0.8
			145.86	63.22	8.99	0.8
			145.39	63.19	8.99	0.8
			145.19	63.16	8.98	0.8
			143.85	63.09	8.98	0.8
			143.69	62.98	8.98	0.8
			143.25	62.89	8.97	0.8
			143.07	62.8	8.97	0.8
			142.82	62.76	8.97	0.8
			142.44	62.65	8.96	0.79
			142.22	62.48	8.96	0.79
			141.99	62.41	8.96	0.79
			141.8	62.4	8.95	0.79
			141.51	62.31	8.95	0.79
			140.84	62.13	8.95	0.79
			140.61	62.11	8.95	0.79
			140.26	62.05	8.94	0.79
			139.28	61.81	8.94	0.79
			139.18	61.8	8.93	0.79
			138.47	61.61	8.93	0.79
			138.32	61.6	8.93	0.79
			138.26	61.58	8.92	0.79
			138.08	61.5	8.92	0.79
			136.83	61.5	8.92	0.79
			136.55	61.47	8.92	0.79
			136.34	61.36	8.91	0.79
			135.93	61.25	8.91	0.79
			135.92	61.24	8.91	0.79
			135.26	61.19	8.9	0.78
			134.41	61.18	8.9	0.78
			134.24	61.17	8.89	0.78
			133.07	61.13	8.89	0.78
			132.69	61.09	8.89	0.78
			132.19	61.08	8.89	0.78
			131.52	61.04	8.88	0.78
			131.51	61.02	8.88	0.78
			130.42	60.97	8.88	0.78
			130.38	60.91	8.88	0.78
			129.83	60.88	8.88	0.78
			128.5	60.85	8.88	0.78
			128.18	60.84	8.88	0.78
			127.82	60.75	8.87	0.78
			127.45	60.69	8.87	0.78
			126.4	60.69	8.86	0.78
			126.1	60.62	8.86	0.78
			125.6	60.57	8.86	0.78
			125.53	60.51	8.86	0.78
			125.47	60.49	8.85	0.77
			125.39	60.46	8.85	0.77
			125.31	60.45	8.85	0.77
			125.09	60.32	8.85	0.77
			124.91	60.25	8.85	0.77
			124.47	60.23	8.85	0.77
			124.13	60.18	8.85	0.77
			124.08	60.16	8.84	0.77
			124.08	60.06	8.84	0.77
			124.05	60.04	8.84	0.77
			124	59.93	8.84	0.77
			123.75	59.93	8.83	0.77
			123.66	59.91	8.83	0.77
			123.45	59.79	8.82	0.77
			123.42	59.77	8.82	0.77
			123.28	59.65	8.81	0.77
			123.26	59.57	8.81	0.77
			123.12	59.45	8.81	0.77
			123.05	59.41	8.81	0.77
			122.79	59.4	8.81	0.77
			122.76	59.37	8.81	0.77
			122.34	59.31	8.81	0.77
			122.21	59.28	8.81	0.76
			122.11	59.27	8.8	0.76
			121.89	59.24	8.8	0.76
			121.87	59.19	8.79	0.76
			121.85	59.18	8.78	0.76
			120.31	59.18	8.78	0.76
			120.27	59.17	8.77	0.76
			120.25	59.15	8.77	0.76
			120.17	59.1	8.77	0.76
			120.06	59.08	8.77	0.76
			120.01	59.02	8.76	0.76
			119.93	58.98	8.76	0.76
			119.71	58.98	8.76	0.76
			119.64	58.96	8.75	0.76
			119.6	58.91	8.75	0.76
			119.43	58.84	8.75	0.76
			119.1	58.81	8.75	0.76
			118.94	58.73	8.75	0.76
			118.76	58.65	8.74	0.76
			118.67	58.61	8.74	0.76
			118.04	58.39	8.74	0.76
			117.79	58.3	8.73	0.76
			117.72	58.27	8.73	0.76
			117.34	58.26	8.72	0.75
			117.15	58.1	8.72	0.75
			116.06	58.05	8.72	0.75
			115.98	58.03	8.72	0.75
			115.58	58.03	8.71	0.75
			115.58	57.97	8.71	0.75
			115.13	57.95	8.71	0.75
			114.92	57.95	8.7	0.75
			114.86	57.92	8.7	0.75
			114.68	57.9	8.7	0.75
			113.93	57.83	8.7	0.75
			113.18	57.76	8.7	0.75
			113.13	57.74	8.7	0.75
			112.91	57.7	8.69	0.75
			112.8	57.63	8.69	0.75
			112.62	57.63	8.69	0.75
			112.51	57.4	8.69	0.75
			112.48	57.36	8.69	0.75
			112.37	57.24	8.68	0.75
			112.17	57.22	8.68	0.75
			111.99	57.05	8.68	0.75
			111.99	56.96	8.68	0.75
			111.81	56.95	8.68	0.75
			111.78	56.86	8.68	0.75
			111.74	56.8	8.67	0.74
			111.36	56.69	8.67	0.74
			110.65	56.64	8.65	0.74
			110.43	56.59	8.65	0.74
			109.9	56.59	8.65	0.74
			109.68	56.52	8.64	0.74
			109.48	56.51	8.64	0.74
			109.21	56.5	8.64	0.74
			109.18	56.44	8.64	0.74
			108.8	56.28	8.64	0.74
			108.75	56.17	8.64	0.74
			108.63	56.12	8.64	0.74
			108.41	56.09	8.62	0.74
			108.18	55.98	8.62	0.74
			107.9	55.76	8.62	0.74
			107.81	55.75	8.61	0.74
			107.19	55.71	8.61	0.74
			106.71	55.67	8.61	0.74
			106.65	55.64	8.61	0.74
			106.64	55.6	8.6	0.74
			106.62	55.52	8.6	0.74
			106.31	55.52	8.6	0.74
			106.24	55.47	8.6	0.74
			105.86	55.42	8.6	0.74
			105.85	55.32	8.6	0.74
			105.26	55.3	8.6	0.73
			105.23	55.24	8.59	0.73
			104.96	55.23	8.59	0.73
			104.95	55.04	8.59	0.73
			104.8	54.99	8.58	0.73
			103.99	54.96	8.58	0.73
			103.98	54.94	8.58	0.73
			103.87	54.85	8.58	0.73
			103.11	54.84	8.58	0.73
			103.09	54.83	8.58	0.73
			102.87	54.8	8.58	0.73
			102.81	54.75	8.58	0.73
			102.73	54.73	8.57	0.73
			102.58	54.72	8.57	0.73
			102.19	54.66	8.57	0.73
			102.19	54.6	8.57	0.73
			102.18	54.59	8.56	0.73
			102.08	54.58	8.56	0.73
			101.24	54.57	8.56	0.73
			101.17	54.57	8.56	0.73
			101.1	54.52	8.56	0.73
			101.09	54.46	8.56	0.73
			100.83	54.45	8.56	0.73
			100.73	54.44	8.55	0.73
			100.67	54.43	8.55	0.73
			100.48	54.41	8.55	0.73
			100.44	54.39	8.55	0.73
			100.17	54.15	8.55	0.73
			100.14	54.11	8.55	0.73
				54.03	8.54	0.72
				54.02	8.54	0.72
				53.9	8.54	0.72
				53.86	8.54	0.72
				53.71	8.54	0.72
				53.6	8.53	0.72
				53.57	8.53	0.72
				53.55	8.53	0.72
				53.54	8.53	0.72
				53.41	8.53	0.72
				53.4	8.53	0.72
				53.39	8.51	0.72
				53.34	8.51	0.72
				53.28	8.51	0.72
				53.23	8.5	0.72
				53.2	8.5	0.72
				53.19	8.5	0.72
				53.09	8.5	0.72
				53.08	8.5	0.72
				53.06	8.5	0.72
				53.03	8.5	0.72
				52.92	8.49	0.72
				52.92	8.49	0.72
				52.9	8.49	0.71
				52.89	8.49	0.71
				52.77	8.48	0.71
				52.75	8.48	0.71
				52.71	8.47	0.71
				52.71	8.47	0.71
				52.63	8.46	0.71
				52.63	8.46	0.71
				52.45	8.46	0.71
				52.4	8.45	0.71
				52.32	8.45	0.71
				52.29	8.45	0.71
				52.23	8.44	0.71
				52.17	8.44	0.71
				52.11	8.44	0.71
				52.09	8.44	0.71
				52.07	8.44	0.71
				52.06	8.43	0.7
				52.05	8.43	0.7
				51.9	8.43	0.7
				51.81	8.43	0.7
				51.81	8.42	0.7
				51.77	8.42	0.7
				51.69	8.42	0.7
				51.65	8.42	0.7
				51.63	8.41	0.7
				51.56	8.41	0.7
				51.43	8.41	0.7
				51.38	8.41	0.7
				51.38	8.4	0.7
				51.35	8.4	0.7
				51.28	8.4	0.7
				51.24	8.4	0.7
				51.06	8.4	0.7
				50.97	8.4	0.7
				50.94	8.39	0.69
				50.81	8.39	0.69
				50.75	8.39	0.69
				50.73	8.39	0.69
				50.72	8.39	0.69
				50.72	8.39	0.69
				50.68	8.38	0.69
				50.66	8.38	0.69
				50.62	8.38	0.69
				50.61	8.37	0.69
				50.57	8.37	0.69
				50.56	8.37	0.69
				50.56	8.37	0.69
				50.55	8.37	0.69
				50.52	8.37	0.69
				50.52	8.37	0.69
				50.44	8.37	0.69
				50.43	8.37	0.69
				50.4	8.36	0.69
				50.35	8.35	0.69
				50.29	8.35	0.69
				50.26	8.35	0.69
				50.13	8.35	0.69
				50.11	8.34	0.69
				50.07	8.34	0.69
				50.04	8.33	0.69
				49.99	8.33	0.68
				49.98	8.33	0.68
				49.9	8.32	0.68
				49.81	8.32	0.68
				49.81	8.32	0.68
				49.75	8.32	0.68
				49.71	8.32	0.68
				49.68	8.31	0.68
				49.67	8.31	0.68
				49.56	8.3	0.68
				49.52	8.3	0.68
				49.52	8.3	0.68
				49.43	8.3	0.68
				49.42	8.3	0.68
				49.33	8.29	0.68
				49.18	8.29	0.68
				49.06	8.28	0.68
				49.02	8.28	0.68
				49.02	8.27	0.68
				49.01	8.27	0.67
				48.87	8.26	0.67
				48.84	8.26	0.67
				48.79	8.26	0.67
				48.78	8.26	0.67
				48.75	8.26	0.67
				48.74	8.25	0.67
				48.71	8.25	0.67
				48.7	8.25	0.67
				48.63	8.24	0.67
				48.58	8.24	0.67
				48.57	8.24	0.67
				48.55	8.24	0.67
				48.52	8.24	0.67
				48.42	8.24	0.67
				48.23	8.23	0.67
				48.23	8.23	0.67
				48.23	8.23	0.67
				48.22	8.22	0.67
				48.22	8.22	0.67
				48.2	8.21	0.67
				48.16	8.21	0.67
				48.14	8.21	0.67
				48.13	8.21	0.67
				48.12	8.2	0.67
				48.11	8.2	0.67
				48.09	8.2	0.66
				47.95	8.19	0.66
				47.94	8.17	0.66
				47.93	8.17	0.66
				47.79	8.17	0.66
				47.79	8.17	0.66
				47.78	8.16	0.66
				47.77	8.16	0.66
				47.66	8.15	0.66
				47.65	8.14	0.66
				47.65	8.14	0.66
				47.63	8.13	0.66
				47.61	8.13	0.66
				47.56	8.12	0.66
				47.53	8.12	0.66
				47.53	8.11	0.66
				47.44	8.11	0.66
				47.34	8.11	0.66
				47.32	8.11	0.66
				47.32	8.1	0.66
				47.29	8.09	0.66
				47.2	8.09	0.66
				47.18	8.09	0.66
				47.12	8.09	0.66
				47.11	8.09	0.66
				47.1	8.08	0.66
				47.08	8.08	0.66
				47.06	8.07	0.66
				47.01	8.07	0.65
				47	8.06	0.65
				46.92	8.06	0.65
				46.9	8.06	0.65
				46.85	8.06	0.65
				46.82	8.06	0.65
				46.82	8.05	0.65
				46.79	8.05	0.65
				46.74	8.05	0.65
				46.65	8.05	0.65
				46.65	8.04	0.65
				46.62	8.04	0.65
				46.6	8.04	0.65
				46.6	8.04	0.65
				46.59	8.04	0.65
				46.52	8.03	0.65
				46.47	8.03	0.65
				46.44	8.03	0.65
				46.4	8.03	0.65
				46.34	8.01	0.65
				46.3	8.01	0.65
				46.19	8.01	0.65
				46.18	8	0.65
				46.16	8	0.65
				46.14	7.99	0.65
				46.13	7.99	0.65
				46.12	7.99	0.65
				46.12	7.99	0.65
				46.1	7.99	0.65
				46.06	7.99	0.65
				46.02	7.99	0.65
				45.99	7.98	0.64
				45.97	7.98	0.64
				45.96	7.98	0.64
				45.9	7.98	0.64
				45.89	7.98	0.64
				45.88	7.97	0.64
				45.86	7.96	0.64
				45.83	7.96	0.64
				45.82	7.96	0.64
				45.74	7.96	0.64
				45.74	7.95	0.64
				45.73	7.95	0.64
				45.7	7.95	0.64
				45.7	7.95	0.64
				45.69	7.95	0.64
				45.65	7.94	0.64
				45.57	7.94	0.64
				45.43	7.93	0.64
				45.4	7.93	0.64
				45.38	7.93	0.64
				45.37	7.93	0.64
				45.34	7.93	0.64
				45.27	7.92	0.64
				45.26	7.92	0.64
				45.25	7.92	0.64
				45.25	7.92	0.64
				45.24	7.92	0.64
				45.22	7.9	0.64
				45.21	7.9	0.64
				45.16	7.9	0.64
				45.15	7.9	0.64
				45.13	7.9	0.63
				45.11	7.9	0.63
				45.1	7.9	0.63
				45.06	7.89	0.63
				45.06	7.89	0.63
				45.05	7.88	0.63
				45.04	7.88	0.63
				45.04	7.88	0.63
				45.01	7.88	0.63
				44.99	7.88	0.63
				44.98	7.87	0.63
				44.97	7.87	0.63
				44.92	7.87	0.63
				44.91	7.87	0.63
				44.88	7.86	0.63
				44.82	7.86	0.63
				44.81	7.86	0.63
				44.76	7.86	0.63
				44.75	7.85	0.63
				44.71	7.85	0.63
				44.7	7.85	0.63
				44.68	7.84	0.63
				44.63	7.84	0.63
				44.59	7.84	0.63
				44.48	7.83	0.63
				44.47	7.83	0.63
				44.46	7.83	0.63
				44.45	7.83	0.63
				44.36	7.83	0.63
				44.33	7.82	0.63
				44.31	7.82	0.62
				44.27	7.82	0.62
				44.25	7.82	0.62
				44.25	7.82	0.62
				44.22	7.81	0.62
				44.18	7.81	0.62
				44.16	7.81	0.62
				44.16	7.81	0.62
				44.13	7.81	0.62
				44.13	7.8	0.62
				44.13	7.8	0.62
				44.12	7.8	0.62
				44.12	7.8	0.62
				44.11	7.8	0.62
				44.11	7.79	0.62
				44.05	7.78	0.62
				44.01	7.78	0.62
				43.96	7.78	0.62
				43.95	7.78	0.62
				43.94	7.77	0.61
				43.91	7.77	0.61
				43.88	7.77	0.61
				43.87	7.76	0.61
				43.87	7.76	0.61
				43.87	7.75	0.61
				43.82	7.75	0.61
				43.8	7.75	0.61
				43.78	7.75	0.61
				43.71	7.75	0.61
				43.7	7.75	0.61
				43.53	7.75	0.61
				43.48	7.74	0.61
				43.46	7.74	0.61
				43.46	7.74	0.61
				43.44	7.74	0.61
				43.42	7.74	0.61
				43.41	7.74	0.61
				43.39	7.73	0.61
				43.38	7.72	0.61
				43.37	7.72	0.61
				43.36	7.72	0.61
				43.33	7.71	0.61
				43.32	7.71	0.61
				43.28	7.71	0.61
				43.27	7.71	0.61
				43.21	7.7	0.61
				43.21	7.7	0.61
				43.19	7.7	0.61
				43.13	7.69	0.61
				43.06	7.69	0.61
				43.03	7.69	0.61
				43.01	7.69	0.6
				42.97	7.69	0.6
				42.97	7.69	0.6
				42.96	7.68	0.6
				42.94	7.68	0.6
				42.93	7.68	0.6
				42.92	7.68	0.6
				42.91	7.68	0.6
				42.88	7.67	0.6
				42.87	7.67	0.6
				42.86	7.67	0.6
				42.85	7.67	0.6
				42.77	7.66	0.6
				42.76	7.66	0.6
				42.75	7.66	0.6
				42.73	7.66	0.6
				42.7	7.66	0.6
				42.65	7.66	0.6
				42.64	7.66	0.6
				42.62	7.65	0.6
				42.57	7.65	0.6
				42.52	7.65	0.6
				42.48	7.65	0.6
				42.43	7.64	0.6
				42.41	7.64	0.6
				42.41	7.63	0.59
				42.4	7.63	0.59
				42.38	7.63	0.59
				42.35	7.63	0.59
				42.34	7.63	0.59
				42.31	7.62	0.59
				42.25	7.62	0.59
				42.14	7.62	0.59
				42.08	7.62	0.59
				42.03	7.61	0.59
				42.01	7.61	0.59
				41.98	7.61	0.59
				41.98	7.61	0.59
				41.92	7.61	0.59
				41.89	7.61	0.59
				41.88	7.6	0.59
				41.83	7.6	0.59
				41.73	7.6	0.59
				41.67	7.6	0.59
				41.65	7.6	0.59
				41.64	7.59	0.59
				41.56	7.59	0.59
				41.52	7.59	0.59
				41.42	7.59	0.59
				41.39	7.59	0.59
				41.39	7.58	0.59
				41.36	7.58	0.59
				41.34	7.58	0.59
				41.34	7.58	0.59
				41.33	7.58	0.59
				41.27	7.58	0.58
				41.26	7.56	0.58
				41.24	7.56	0.58
				41.23	7.56	0.58
				41.22	7.56	0.58
				41.21	7.56	0.58
				41.15	7.56	0.58
				41.12	7.55	0.58
				41.1	7.55	0.58
				41.1	7.55	0.58
				41.09	7.55	0.58
				41.08	7.54	0.58
				41.08	7.54	0.58
				41.06	7.54	0.58
				41	7.53	0.58
				41	7.53	0.58
				40.92	7.53	0.58
				40.91	7.52	0.58
				40.9	7.51	0.58
				40.89	7.51	0.58
				40.85	7.51	0.58
				40.84	7.51	0.58
				40.8	7.51	0.58
				40.75	7.51	0.58
				40.73	7.51	0.58
				40.67	7.5	0.58
				40.66	7.5	0.57
				40.57	7.5	0.57
				40.53	7.5	0.57
				40.52	7.5	0.57
				40.47	7.5	0.57
				40.44	7.5	0.57
				40.43	7.5	0.57
				40.42	7.49	0.57
				40.34	7.49	0.57
				40.28	7.49	0.57
				40.23	7.49	0.57
				40.22	7.49	0.57
				40.19	7.49	0.57
				40.15	7.48	0.57
				40.14	7.48	0.57
				40.12	7.48	0.57
				40.04	7.47	0.57
				40	7.46	0.57
				39.93	7.46	0.57
				39.93	7.46	0.57
				39.92	7.46	0.57
				39.88	7.46	0.57
				39.87	7.46	0.57
				39.86	7.45	0.57
				39.83	7.45	0.57
				39.81	7.45	0.57
				39.75	7.45	0.57
				39.68	7.45	0.56
				39.67	7.45	0.56
				39.62	7.45	0.56
				39.51	7.45	0.56
				39.35	7.44	0.56
				39.32	7.44	0.56
				39.3	7.43	0.56
				39.26	7.43	0.56
				39.25	7.43	0.56
				39.25	7.43	0.56
				39.22	7.43	0.56
				39.21	7.43	0.56
				39.2	7.43	0.56
				39.2	7.42	0.56
				39.13	7.42	0.56
				39.11	7.41	0.56
				39.1	7.41	0.56
				39.04	7.41	0.56
				39.03	7.4	0.56
				39.02	7.4	0.56
				39.02	7.4	0.56
				39	7.4	0.56
				39	7.4	0.56
				38.99	7.4	0.56
				38.97	7.39	0.56
				38.94	7.39	0.56
				38.81	7.39	0.56
				38.8	7.38	0.56
				38.78	7.38	0.56
				38.77	7.38	0.56
				38.77	7.38	0.56
				38.75	7.38	0.56
				38.73	7.37	0.56
				38.73	7.36	0.55
				38.72	7.36	0.55
				38.7	7.35	0.55
				38.7	7.35	0.55
				38.65	7.34	0.55
				38.64	7.34	0.55
				38.56	7.34	0.55
				38.52	7.34	0.55
				38.51	7.34	0.55
				38.48	7.34	0.55
				38.46	7.33	0.55
				38.45	7.33	0.55
				38.44	7.33	0.55
				38.44	7.33	0.55
				38.41	7.33	0.55
				38.34	7.32	0.55
				38.34	7.31	0.55
				38.34	7.31	0.55
				38.28	7.31	0.55
				38.28	7.31	0.55
				38.18	7.31	0.55
				38.17	7.3	0.55
				38.13	7.3	0.55
				38.11	7.29	0.55
				38.11	7.29	0.55
				38.1	7.29	0.54
				38.09	7.29	0.54
				38.08	7.28	0.54
				38.08	7.28	0.54
				38.07	7.28	0.54
				38.06	7.28	0.54
				38.05	7.28	0.54
				38.04	7.28	0.54
				38	7.28	0.54
				37.99	7.28	0.54
				37.95	7.27	0.54
				37.91	7.27	0.54
				37.89	7.27	0.54
				37.89	7.26	0.54
				37.86	7.26	0.54
				37.86	7.26	0.54
				37.85	7.26	0.54
				37.83	7.25	0.54
				37.78	7.25	0.54
				37.77	7.25	0.54
				37.76	7.25	0.54
				37.74	7.24	0.54
				37.73	7.24	0.54
				37.73	7.24	0.54
				37.71	7.24	0.54
				37.7	7.23	0.54
				37.68	7.23	0.54
				37.67	7.23	0.53
				37.65	7.23	0.53
				37.55	7.23	0.53
				37.45	7.23	0.53
				37.43	7.23	0.53
				37.42	7.23	0.53
				37.33	7.22	0.53
				37.32	7.22	0.53
				37.31	7.22	0.53
				37.3	7.22	0.53
				37.28	7.21	0.53
				37.27	7.21	0.53
				37.27	7.21	0.53
				37.21	7.2	0.53
				37.19	7.2	0.53
				37.19	7.2	0.53
				37.18	7.2	0.53
				37.16	7.19	0.53
				37.16	7.19	0.53
				37.15	7.19	0.53
				37.07	7.19	0.53
				37.07	7.19	0.53
				37.06	7.19	0.53
				37.05	7.18	0.53
				37.02	7.18	0.53
				37	7.18	0.53
				37	7.18	0.52
				36.99	7.18	0.52
				36.98	7.18	0.52
				36.88	7.18	0.52
				36.87	7.17	0.52
				36.82	7.17	0.52
				36.81	7.17	0.52
				36.81	7.17	0.52
				36.79	7.17	0.52
				36.79	7.16	0.52
				36.72	7.16	0.52
				36.68	7.16	0.52
				36.64	7.16	0.52
				36.63	7.16	0.52
				36.6	7.16	0.52
				36.59	7.16	0.52
				36.58	7.16	0.52
				36.56	7.15	0.52
				36.53	7.15	0.52
				36.48	7.15	0.52
				36.47	7.15	0.52
				36.43	7.15	0.52
				36.41	7.14	0.52
				36.38	7.14	0.52
				36.37	7.14	0.52
				36.35	7.14	0.52
				36.34	7.13	0.52
				36.34	7.13	0.51
				36.33	7.13	0.51
				36.29	7.13	0.51
				36.28	7.12	0.51
				36.24	7.12	0.51
				36.06	7.12	0.51
				36.02	7.12	0.51
				36.01	7.12	0.51
				35.99	7.11	0.51
				35.93	7.11	0.51
				35.93	7.11	0.51
				35.92	7.11	0.51
				35.88	7.11	0.51
				35.87	7.1	0.51
				35.8	7.1	0.51
				35.78	7.1	0.51
				35.76	7.1	0.51
				35.75	7.1	0.51
				35.71	7.1	0.51
				35.71	7.1	0.51
				35.7	7.1	0.51
				35.7	7.09	0.51
				35.67	7.09	0.51
				35.59	7.09	0.51
				35.56	7.09	0.51
				35.55	7.09	0.51
				35.52	7.09	0.51
				35.46	7.09	0.51
				35.39	7.09	0.51
				35.38	7.09	0.51
				35.37	7.09	0.51
				35.33	7.09	0.51
				35.32	7.08	0.51
				35.26	7.08	0.5
				35.21	7.08	0.5
				35.2	7.08	0.5
				35.19	7.08	0.5
				35.16	7.08	0.5
				35.14	7.08	0.5
				35.06	7.08	0.5
				35.03	7.07	0.5
				34.95	7.07	0.5
				34.94	7.07	0.5
				34.9	7.07	0.5
				34.88	7.07	0.5
				34.86	7.07	0.5
				34.84	7.06	0.5
				34.81	7.06	0.5
				34.8	7.06	0.5
				34.8	7.05	0.5
				34.79	7.05	0.5
				34.76	7.05	0.5
				34.75	7.05	0.5
				34.73	7.05	0.49
				34.68	7.05	0.49
				34.68	7.05	0.49
				34.68	7.05	0.49
				34.66	7.05	0.49
				34.64	7.04	0.49
				34.62	7.04	0.49
				34.59	7.04	0.49
				34.55	7.04	0.49
				34.54	7.03	0.49
				34.51	7.03	0.49
				34.49	7.03	0.49
				34.45	7.03	0.49
				34.45	7.02	0.49
				34.42	7.02	0.49
				34.42	7.02	0.49
				34.41	7.02	0.49
				34.41	7.02	0.49
				34.41	7.01	0.49
				34.37	7.01	0.49
				34.36	7.01	0.49
				34.32	7.01	0.49
				34.31	7.01	0.49
				34.3	7.01	0.49
				34.27	7.01	0.49
				34.22	7.01	0.49
				34.21	7.01	0.49
				34.18	7.01	0.49
				34.17	7.01	0.49
				34.17	7	0.48
				34.16	7	0.48
				34.16	7	0.48
				34.14	7	0.48
				34.13	7	0.48
				34.12	7	0.48
				34.11	7	0.48
				34.06	7	0.48
				34.02	7	0.48
				34.01	6.99	0.48
				34	6.99	0.48
				33.96	6.99	0.48
				33.9	6.99	0.48
				33.89	6.98	0.48
				33.88	6.98	0.48
				33.86	6.98	0.48
				33.85	6.98	0.48
				33.85	6.98	0.48
				33.82	6.97	0.48
				33.79	6.96	0.48
				33.75	6.96	0.48
				33.75	6.96	0.48
				33.74	6.95	0.48
				33.73	6.95	0.48
				33.69	6.95	0.48
				33.68	6.95	0.48
				33.67	6.95	0.48
				33.66	6.95	0.48
				33.64	6.94	0.48
				33.59	6.94	0.48
				33.56	6.94	0.48
				33.56	6.94	0.48
				33.54	6.93	0.48
				33.5	6.92	0.47
				33.48	6.92	0.47
				33.45	6.92	0.47
				33.45	6.92	0.47
				33.45	6.92	0.47
				33.42	6.92	0.47
				33.42	6.92	0.47
				33.4	6.92	0.47
				33.35	6.91	0.47
				33.33	6.91	0.47
				33.33	6.9	0.47
				33.28	6.9	0.47
				33.26	6.9	0.47
				33.25	6.9	0.47
				33.24	6.9	0.47
				33.21	6.9	0.47
				33.21	6.89	0.47
				33.19	6.89	0.47
				33.16	6.89	0.47
				33.14	6.88	0.47
				33.14	6.88	0.47
				33.12	6.87	0.47
				33.11	6.87	0.47
				33.11	6.87	0.47
				33.07	6.87	0.46
				33.04	6.87	0.46
				33.03	6.86	0.46
				33.01	6.86	0.46
				32.97	6.86	0.46
				32.96	6.86	0.46
				32.94	6.85	0.46
				32.92	6.85	0.46
				32.84	6.85	0.46
				32.84	6.85	0.46
				32.82	6.85	0.46
				32.82	6.84	0.46
				32.75	6.84	0.46
				32.72	6.84	0.46
				32.71	6.84	0.46
				32.65	6.83	0.46
				32.65	6.83	0.46
				32.64	6.83	0.46
				32.64	6.83	0.46
				32.64	6.83	0.46
				32.62	6.83	0.46
				32.61	6.83	0.46
				32.59	6.83	0.46
				32.56	6.83	0.46
				32.55	6.83	0.46
				32.51	6.83	0.46
				32.51	6.82	0.46
				32.49	6.82	0.46
				32.42	6.82	0.46
				32.41	6.82	0.46
				32.41	6.82	0.46
				32.4	6.82	0.46
				32.36	6.81	0.46
				32.36	6.81	0.46
				32.32	6.8	0.46
				32.32	6.8	0.46
				32.32	6.8	0.45
				32.3	6.8	0.45
				32.29	6.8	0.45
				32.28	6.8	0.45
				32.28	6.8	0.45
				32.27	6.8	0.45
				32.27	6.79	0.45
				32.24	6.79	0.45
				32.24	6.79	0.45
				32.2	6.79	0.45
				32.18	6.78	0.45
				32.18	6.78	0.45
				32.14	6.78	0.45
				32.14	6.78	0.45
				32.13	6.78	0.45
				32.12	6.78	0.45
				32.1	6.77	0.45
				32.06	6.76	0.45
				32.03	6.76	0.45
				32.02	6.76	0.45
				32.02	6.76	0.45
				31.99	6.76	0.45
				31.97	6.76	0.45
				31.92	6.76	0.45
				31.92	6.76	0.45
				31.92	6.75	0.45
				31.91	6.75	0.45
				31.91	6.75	0.45
				31.89	6.74	0.45
				31.89	6.73	0.45
				31.85	6.73	0.45
				31.83	6.73	0.45
				31.8	6.73	0.45
				31.77	6.73	0.45
				31.74	6.73	0.45
				31.73	6.73	0.45
				31.72	6.73	0.45
				31.71	6.73	0.44
				31.68	6.72	0.44
				31.68	6.72	0.44
				31.67	6.72	0.44
				31.67	6.7	0.44
				31.67	6.7	0.44
				31.66	6.69	0.44
				31.66	6.69	0.44
				31.64	6.69	0.44
				31.62	6.69	0.44
				31.61	6.69	0.44
				31.59	6.68	0.44
				31.58	6.68	0.44
				31.58	6.68	0.44
				31.57	6.68	0.44
				31.55	6.68	0.44
				31.55	6.68	0.44
				31.52	6.67	0.44
				31.51	6.67	0.44
				31.51	6.67	0.44
				31.46	6.67	0.44
				31.45	6.67	0.44
				31.42	6.67	0.44
				31.38	6.67	0.44
				31.38	6.66	0.44
				31.38	6.66	0.44
				31.35	6.66	0.44
				31.35	6.66	0.44
				31.34	6.65	0.44
				31.33	6.65	0.44
				31.32	6.65	0.43
				31.32	6.65	0.43
				31.3	6.65	0.43
				31.3	6.64	0.43
				31.29	6.64	0.43
				31.28	6.64	0.43
				31.28	6.63	0.43
				31.24	6.63	0.43
				31.19	6.63	0.43
				31.16	6.63	0.43
				31.15	6.62	0.43
				31.14	6.62	0.43
				31.11	6.62	0.43
				31.11	6.62	0.43
				31.1	6.62	0.43
				31.06	6.62	0.43
				31.05	6.62	0.43
				31.04	6.61	0.43
				31.03	6.61	0.43
				31.03	6.61	0.43
				31.01	6.61	0.43
				31.01	6.61	0.43
				31.01	6.61	0.43
				30.99	6.61	0.43
				30.99	6.6	0.43
				30.97	6.6	0.43
				30.97	6.6	0.43
				30.96	6.6	0.43
				30.96	6.6	0.43
				30.94	6.6	0.43
				30.91	6.6	0.43
				30.89	6.59	0.43
				30.82	6.59	0.43
				30.79	6.59	0.43
				30.79	6.59	0.43
				30.79	6.59	0.43
				30.67	6.59	0.43
				30.65	6.59	0.42
				30.62	6.58	0.42
				30.61	6.58	0.42
				30.59	6.58	0.42
				30.58	6.57	0.42
				30.52	6.57	0.42
				30.52	6.57	0.42
				30.51	6.57	0.42
				30.51	6.57	0.42
				30.46	6.57	0.42
				30.45	6.56	0.42
				30.43	6.56	0.42
				30.42	6.56	0.42
				30.41	6.56	0.42
				30.41	6.56	0.42
				30.41	6.56	0.42
				30.39	6.56	0.42
				30.39	6.55	0.42
				30.38	6.55	0.42
				30.38	6.55	0.42
				30.37	6.55	0.42
				30.33	6.55	0.42
				30.3	6.55	0.42
				30.29	6.55	0.42
				30.28	6.54	0.42
				30.24	6.54	0.42
				30.23	6.54	0.42
				30.19	6.54	0.42
				30.18	6.53	0.42
				30.16	6.53	0.42
				30.14	6.53	0.42
				30.12	6.53	0.42
				30.11	6.53	0.42
				30.08	6.53	0.42
				30.04	6.53	0.42
				30.01	6.52	0.42
				30	6.52	0.42
				29.99	6.52	0.42
				29.99	6.52	0.42
				29.98	6.51	0.42
				29.96	6.51	0.42
				29.89	6.51	0.41
				29.88	6.51	0.41
				29.88	6.51	0.41
				29.88	6.5	0.41
				29.87	6.5	0.41
				29.87	6.5	0.41
				29.86	6.49	0.41
				29.85	6.49	0.41
				29.84	6.49	0.41
				29.83	6.49	0.41
				29.82	6.49	0.41
				29.81	6.49	0.41
				29.77	6.49	0.41
				29.75	6.49	0.41
				29.72	6.48	0.41
				29.71	6.48	0.41
				29.71	6.48	0.41
				29.71	6.48	0.41
				29.67	6.48	0.41
				29.62	6.48	0.41
				29.61	6.48	0.41
				29.58	6.47	0.41
				29.58	6.47	0.41
				29.56	6.47	0.41
				29.56	6.47	0.41
				29.55	6.47	0.41
				29.53	6.47	0.41
				29.53	6.47	0.41
				29.51	6.46	0.41
				29.51	6.46	0.41
				29.5	6.46	0.41
				29.5	6.46	0.41
				29.48	6.46	0.41
				29.46	6.46	0.41
				29.44	6.45	0.41
				29.43	6.45	0.4
				29.42	6.45	0.4
				29.41	6.45	0.4
				29.4	6.45	0.4
				29.39	6.45	0.4
				29.39	6.44	0.4
				29.39	6.44	0.4
				29.35	6.43	0.4
				29.34	6.43	0.4
				29.34	6.43	0.4
				29.33	6.43	0.4
				29.33	6.43	0.4
				29.32	6.43	0.4
				29.32	6.43	0.4
				29.29	6.43	0.4
				29.29	6.43	0.4
				29.29	6.43	0.4
				29.25	6.43	0.4
				29.25	6.42	0.4
				29.19	6.42	0.4
				29.17	6.42	0.4
				29.16	6.42	0.4
				29.16	6.42	0.4
				29.16	6.41	0.4
				29.13	6.41	0.4
				29.12	6.41	0.4
				29.09	6.41	0.4
				29.08	6.4	0.4
				29.08	6.4	0.4
				29.05	6.4	0.4
				29.04	6.4	0.4
				29.04	6.4	0.39
				29.04	6.4	0.39
				29	6.4	0.39
				28.99	6.4	0.39
				28.98	6.39	0.39
				28.98	6.39	0.39
				28.94	6.39	0.39
				28.93	6.39	0.39
				28.93	6.39	0.39
				28.93	6.39	0.39
				28.88	6.38	0.39
				28.87	6.38	0.39
				28.87	6.38	0.39
				28.86	6.38	0.39
				28.84	6.38	0.39
				28.83	6.38	0.39
				28.82	6.38	0.39
				28.8	6.38	0.39
				28.78	6.38	0.39
				28.78	6.37	0.39
				28.77	6.37	0.39
				28.72	6.37	0.39
				28.71	6.37	0.39
				28.69	6.37	0.39
				28.67	6.37	0.39
				28.66	6.37	0.39
				28.66	6.35	0.39
				28.64	6.35	0.39
				28.64	6.35	0.39
				28.63	6.35	0.39
				28.62	6.35	0.39
				28.62	6.34	0.39
				28.6	6.34	0.39
				28.6	6.33	0.39
				28.6	6.33	0.39
				28.6	6.33	0.39
				28.58	6.33	0.39
				28.58	6.33	0.39
				28.57	6.33	0.39
				28.55	6.33	0.39
				28.53	6.32	0.39
				28.52	6.32	0.39
				28.52	6.32	0.39
				28.48	6.32	0.39
				28.46	6.32	0.39
				28.45	6.31	0.39
				28.45	6.31	0.39
				28.44	6.31	0.39
				28.44	6.31	0.39
				28.43	6.31	0.39
				28.43	6.31	0.38
				28.39	6.31	0.38
				28.37	6.3	0.38
				28.35	6.3	0.38
				28.34	6.3	0.38
				28.33	6.3	0.38
				28.29	6.3	0.38
				28.28	6.3	0.38
				28.27	6.3	0.38
				28.26	6.29	0.38
				28.25	6.29	0.38
				28.25	6.29	0.38
				28.24	6.29	0.38
				28.24	6.29	0.38
				28.23	6.29	0.38
				28.21	6.29	0.38
				28.21	6.29	0.38
				28.2	6.28	0.38
				28.18	6.28	0.38
				28.18	6.28	0.38
				28.16	6.28	0.38
				28.14	6.27	0.38
				28.12	6.27	0.38
				28.1	6.27	0.38
				28.07	6.27	0.37
				28.06	6.27	0.37
				28.03	6.27	0.37
				28.02	6.27	0.37
				28.01	6.27	0.37
				28.01	6.26	0.37
				28.01	6.26	0.37
				27.99	6.26	0.37
				27.97	6.25	0.37
				27.97	6.25	0.37
				27.97	6.25	0.37
				27.95	6.25	0.37
				27.95	6.25	0.37
				27.93	6.24	0.37
				27.92	6.24	0.37
				27.91	6.24	0.37
				27.9	6.24	0.37
				27.89	6.24	0.37
				27.89	6.24	0.37
				27.88	6.23	0.37
				27.86	6.23	0.37
				27.85	6.23	0.37
				27.85	6.22	0.37
				27.79	6.22	0.37
				27.79	6.22	0.37
				27.77	6.22	0.37
				27.77	6.22	0.37
				27.76	6.21	0.37
				27.71	6.21	0.37
				27.7	6.21	0.37
				27.69	6.21	0.37
				27.68	6.2	0.37
				27.67	6.2	0.37
				27.67	6.2	0.37
				27.65	6.2	0.37
				27.65	6.2	0.37
				27.64	6.2	0.37
				27.6	6.2	0.37
				27.6	6.19	0.37
				27.58	6.19	0.37
				27.58	6.19	0.37
				27.55	6.19	0.37
				27.54	6.19	0.37
				27.54	6.18	0.36
				27.53	6.18	0.36
				27.52	6.18	0.36
				27.52	6.18	0.36
				27.51	6.18	0.36
				27.5	6.18	0.36
				27.49	6.18	0.36
				27.48	6.18	0.36
				27.47	6.17	0.36
				27.42	6.17	0.36
				27.41	6.17	0.36
				27.41	6.17	0.36
				27.37	6.17	0.36
				27.37	6.17	0.36
				27.36	6.17	0.36
				27.35	6.16	0.36
				27.31	6.16	0.36
				27.29	6.16	0.36
				27.29	6.16	0.36
				27.27	6.15	0.36
				27.22	6.15	0.36
				27.21	6.15	0.36
				27.2	6.15	0.36
				27.18	6.15	0.36
				27.17	6.15	0.36
				27.16	6.14	0.36
				27.15	6.14	0.36
				27.14	6.14	0.36
				27.08	6.14	0.36
				27.07	6.14	0.36
				27.06	6.14	0.36
				27.05	6.14	0.36
				27.03	6.13	0.36
				27.03	6.13	0.36
				27.02	6.13	0.36
				27	6.13	0.36
				26.98	6.13	0.36
				26.97	6.12	0.36
				26.97	6.12	0.36
				26.97	6.12	0.36
				26.96	6.12	0.36
				26.96	6.12	0.35
				26.96	6.12	0.35
				26.94	6.11	0.35
				26.93	6.11	0.35
				26.93	6.11	0.35
				26.89	6.11	0.35
				26.88	6.11	0.35
				26.86	6.11	0.35
				26.83	6.11	0.35
				26.8	6.1	0.35
				26.78	6.1	0.35
				26.78	6.1	0.35
				26.76	6.1	0.35
				26.71	6.1	0.35
				26.7	6.1	0.35
				26.69	6.1	0.35
				26.66	6.09	0.35
				26.65	6.09	0.35
				26.64	6.09	0.35
				26.61	6.08	0.35
				26.61	6.08	0.35
				26.6	6.08	0.35
				26.59	6.07	0.35
				26.57	6.07	0.35
				26.55	6.07	0.35
				26.54	6.06	0.35
				26.52	6.06	0.35
				26.51	6.06	0.35
				26.45	6.05	0.35
				26.43	6.05	0.35
				26.42	6.05	0.35
				26.4	6.05	0.35
				26.36	6.05	0.35
				26.35	6.05	0.35
				26.35	6.05	0.34
				26.35	6.05	0.34
				26.33	6.04	0.34
				26.32	6.04	0.34
				26.28	6.04	0.34
				26.27	6.04	0.34
				26.27	6.04	0.34
				26.26	6.04	0.34
				26.25	6.03	0.34
				26.24	6.03	0.34
				26.24	6.03	0.34
				26.23	6.03	0.34
				26.21	6.02	0.34
				26.2	6.02	0.34
				26.2	6.01	0.34
				26.17	6.01	0.34
				26.17	6.01	0.34
				26.17	6.01	0.34
				26.17	6.01	0.34
				26.17	6	0.34
				26.16	6	0.34
				26.15	6	0.34
				26.14	6	0.34
				26.13	5.99	0.34
				26.12	5.99	0.34
				26.11	5.99	0.34
				26.1	5.99	0.34
				26.09	5.98	0.34
				26.08	5.98	0.34
				26.08	5.98	0.34
				26.07	5.98	0.34
				26.05	5.97	0.34
				26.03	5.97	0.34
				26.02	5.97	0.34
				26	5.97	0.34
				26	5.97	0.34
				25.99	5.96	0.34
				25.99	5.96	0.34
				25.98	5.96	0.34
				25.98	5.96	0.34
				25.97	5.96	0.34
				25.95	5.95	0.34
				25.94	5.95	0.34
				25.93	5.95	0.33
				25.9	5.94	0.33
				25.9	5.94	0.33
				25.89	5.94	0.33
				25.88	5.94	0.33
				25.87	5.94	0.33
				25.85	5.94	0.33
				25.85	5.93	0.33
				25.83	5.93	0.33
				25.83	5.93	0.33
				25.82	5.93	0.33
				25.81	5.93	0.33
				25.79	5.93	0.33
				25.78	5.92	0.33
				25.77	5.92	0.33
				25.77	5.92	0.33
				25.74	5.92	0.33
				25.71	5.91	0.33
				25.67	5.91	0.33
				25.67	5.91	0.33
				25.64	5.91	0.33
				25.64	5.91	0.33
				25.62	5.91	0.33
				25.61	5.91	0.33
				25.61	5.9	0.33
				25.57	5.9	0.33
				25.55	5.9	0.33
				25.55	5.9	0.33
				25.54	5.9	0.33
				25.51	5.9	0.33
				25.5	5.9	0.33
				25.5	5.9	0.33
				25.49	5.89	0.33
				25.49	5.89	0.33
				25.49	5.89	0.33
				25.48	5.89	0.33
				25.48	5.89	0.33
				25.45	5.88	0.33
				25.43	5.88	0.33
				25.43	5.88	0.33
				25.42	5.88	0.33
				25.4	5.88	0.33
				25.39	5.88	0.33
				25.39	5.87	0.33
				25.38	5.87	0.33
				25.35	5.87	0.33
				25.31	5.87	0.33
				25.3	5.87	0.33
				25.25	5.86	0.33
				25.24	5.86	0.33
				25.24	5.86	0.33
				25.22	5.86	0.32
				25.2	5.86	0.32
				25.15	5.85	0.32
				25.11	5.85	0.32
				25.02	5.85	0.32
				25.01	5.85	0.32
				24.99	5.85	0.32
				24.99	5.85	0.32
				24.95	5.84	0.32
				24.94	5.84	0.32
				24.94	5.84	0.32
				24.92	5.84	0.32
				24.92	5.83	0.32
				24.91	5.83	0.32
				24.91	5.83	0.32
				24.91	5.82	0.32
				24.91	5.82	0.32
				24.89	5.82	0.32
				24.87	5.82	0.32
				24.85	5.82	0.32
				24.85	5.82	0.32
				24.83	5.81	0.32
				24.82	5.81	0.32
				24.8	5.81	0.32
				24.79	5.81	0.32
				24.79	5.81	0.32
				24.79	5.81	0.32
				24.79	5.81	0.32
				24.78	5.81	0.32
				24.77	5.8	0.32
				24.77	5.8	0.32
				24.75	5.8	0.32
				24.71	5.8	0.32
				24.7	5.8	0.32
				24.69	5.8	0.32
				24.69	5.8	0.32
				24.68	5.79	0.31
				24.68	5.79	0.31
				24.65	5.79	0.31
				24.61	5.79	0.31
				24.61	5.79	0.31
				24.6	5.78	0.31
				24.6	5.78	0.31
				24.6	5.78	0.31
				24.58	5.78	0.31
				24.58	5.78	0.31
				24.56	5.77	0.31
				24.56	5.77	0.31
				24.52	5.77	0.31
				24.52	5.76	0.31
				24.51	5.76	0.31
				24.5	5.76	0.31
				24.5	5.76	0.31
				24.49	5.76	0.31
				24.48	5.75	0.31
				24.45	5.75	0.31
				24.44	5.74	0.31
				24.44	5.74	0.31
				24.43	5.74	0.31
				24.42	5.74	0.31
				24.42	5.74	0.31
				24.4	5.74	0.31
				24.38	5.74	0.31
				24.37	5.73	0.31
				24.35	5.73	0.31
				24.34	5.73	0.31
				24.33	5.73	0.31
				24.33	5.73	0.31
				24.31	5.72	0.31
				24.28	5.72	0.31
				24.28	5.72	0.31
				24.27	5.72	0.31
				24.27	5.72	0.31
				24.26	5.72	0.31
				24.25	5.72	0.31
				24.23	5.72	0.31
				24.22	5.71	0.31
				24.21	5.71	0.31
				24.2	5.71	0.31
				24.19	5.71	0.31
				24.19	5.71	0.31
				24.18	5.71	0.31
				24.17	5.7	0.31
				24.16	5.7	0.31
				24.15	5.7	0.31
				24.13	5.7	0.31
				24.11	5.7	0.31
				24.1	5.69	0.31
				24.1	5.69	0.3
				24.08	5.69	0.3
				24.05	5.69	0.3
				24.05	5.69	0.3
				24.04	5.69	0.3
				24.02	5.68	0.3
				24.02	5.68	0.3
				24.02	5.68	0.3
				24.01	5.68	0.3
				24.01	5.68	0.3
				24.01	5.68	0.3
				23.98	5.68	0.3
				23.98	5.68	0.3
				23.97	5.68	0.3
				23.92	5.67	0.3
				23.9	5.67	0.3
				23.9	5.67	0.3
				23.89	5.67	0.3
				23.88	5.67	0.3
				23.88	5.67	0.3
				23.87	5.66	0.3
				23.87	5.66	0.3
				23.86	5.66	0.3
				23.86	5.66	0.3
				23.83	5.66	0.3
				23.82	5.66	0.3
				23.82	5.66	0.3
				23.81	5.66	0.3
				23.8	5.66	0.3
				23.8	5.66	0.3
				23.77	5.65	0.3
				23.74	5.65	0.3
				23.74	5.65	0.3
				23.74	5.65	0.3
				23.74	5.65	0.3
				23.7	5.65	0.3
				23.7	5.65	0.3
				23.7	5.65	0.3
				23.69	5.64	0.3
				23.68	5.64	0.3
				23.67	5.64	0.3
				23.66	5.64	0.3
				23.66	5.64	0.3
				23.66	5.64	0.3
				23.65	5.64	0.3
				23.63	5.63	0.3
				23.62	5.63	0.3
				23.62	5.63	0.3
				23.62	5.62	0.29
				23.62	5.62	0.29
				23.61	5.61	0.29
				23.59	5.61	0.29
				23.58	5.61	0.29
				23.56	5.61	0.29
				23.54	5.61	0.29
				23.54	5.6	0.29
				23.52	5.6	0.29
				23.52	5.6	0.29
				23.5	5.59	0.29
				23.5	5.59	0.29
				23.5	5.59	0.29
				23.49	5.58	0.29
				23.49	5.58	0.29
				23.49	5.58	0.29
				23.48	5.58	0.29
				23.48	5.58	0.29
				23.47	5.58	0.29
				23.46	5.58	0.29
				23.46	5.57	0.29
				23.46	5.57	0.29
				23.44	5.57	0.29
				23.43	5.56	0.29
				23.43	5.56	0.29
				23.41	5.56	0.29
				23.41	5.56	0.29
				23.4	5.56	0.29
				23.4	5.56	0.29
				23.38	5.56	0.29
				23.38	5.56	0.29
				23.33	5.56	0.29
				23.32	5.55	0.29
				23.31	5.55	0.29
				23.3	5.55	0.29
				23.29	5.55	0.29
				23.27	5.55	0.29
				23.27	5.55	0.29
				23.24	5.54	0.29
				23.24	5.53	0.29
				23.24	5.53	0.29
				23.23	5.53	0.29
				23.22	5.53	0.29
				23.22	5.53	0.29
				23.18	5.52	0.29
				23.18	5.52	0.29
				23.18	5.52	0.29
				23.17	5.52	0.29
				23.17	5.52	0.29
				23.17	5.51	0.28
				23.16	5.51	0.28
				23.16	5.5	0.28
				23.15	5.5	0.28
				23.14	5.5	0.28
				23.14	5.5	0.28
				23.13	5.5	0.28
				23.11	5.5	0.28
				23.09	5.5	0.28
				23.08	5.5	0.28
				23.07	5.49	0.28
				23.05	5.49	0.28
				23.04	5.48	0.28
				23.04	5.48	0.28
				23.03	5.48	0.28
				23.03	5.48	0.28
				23.03	5.48	0.28
				23.02	5.48	0.28
				23.01	5.47	0.28
				23.01	5.47	0.28
				22.96	5.47	0.28
				22.94	5.47	0.28
				22.92	5.46	0.28
				22.91	5.46	0.28
				22.9	5.46	0.28
				22.9	5.46	0.28
				22.9	5.46	0.28
				22.89	5.46	0.28
				22.88	5.46	0.28
				22.87	5.45	0.28
				22.87	5.45	0.28
				22.87	5.45	0.28
				22.85	5.45	0.28
				22.85	5.44	0.28
				22.83	5.44	0.28
				22.83	5.44	0.28
				22.82	5.44	0.28
				22.81	5.43	0.28
				22.81	5.43	0.28
				22.81	5.43	0.28
				22.81	5.42	0.28
				22.79	5.42	0.28
				22.78	5.42	0.28
				22.78	5.42	0.28
				22.78	5.42	0.28
				22.77	5.41	0.28
				22.77	5.41	0.27
				22.76	5.41	0.27
				22.76	5.41	0.27
				22.72	5.41	0.27
				22.72	5.41	0.27
				22.71	5.4	0.27
				22.71	5.4	0.27
				22.71	5.4	0.27
				22.71	5.4	0.27
				22.71	5.39	0.27
				22.67	5.39	0.27
				22.64	5.39	0.27
				22.63	5.39	0.27
				22.62	5.39	0.27
				22.61	5.39	0.27
				22.61	5.38	0.27
				22.6	5.38	0.27
				22.59	5.38	0.27
				22.58	5.38	0.27
				22.55	5.38	0.27
				22.54	5.37	0.27
				22.53	5.37	0.27
				22.53	5.37	0.27
				22.5	5.37	0.27
				22.47	5.37	0.27
				22.46	5.37	0.27
				22.46	5.37	0.27
				22.46	5.37	0.27
				22.44	5.37	0.27
				22.44	5.37	0.27
[truncated: 3,840 more rows]

## Sheet: Figure 2c
Figure 2c
		% SQSTM1+ CD207+ CD1a+				% TRIM21+ CD207+ CD1a+
		Steady-state LCs	Migrated LCs			Steady-state LCs	Migrated LCs
		12.7	77.3			14	58
		7.86	82.9			38	60.1
		7.05	82.5			12.6	59.8
		8.78	62.4			27.9	40.2

## Sheet: Figure 2d
		T0			T24
	CD83	747.785	756.344	1148.02	1644.2	2403.1	1977.88
	PSMB10	41.8955	44.2839	56.8071	78.7946	122.993	102.086
	BATF3	5.92696	9.98256	9.73365	35.4806	52.6061	35.3503
	PSME2	121.619	136.546	143.53	314.833	336.358	331.307
	IRF1	88.3233	60.3351	121.313	495.346	537.023	495.437
	CD40	121.851	145.429	166.132	325.2	398.389	424.011
	ERAP2	82.2801	160.996	99.6462	258.502	346.786	214.085
	CD84	96.1097	152.377	200.667	192.724	372.053	424.011
	PSMG3-AS1	9.00665	12.2253	11.3834	11.5197	20.5879	15.765
	CD1E	4.24184	6.94821	0.494931	20.0442	134.69	0.725383
	CD82	1.10404	4.08977	3.29954	30.2968	17.0452	30.0792
	CAV1	3.71888	6.64038	8.35884	51.493	38.7026	33.6094
	CLU	11.6215	5.80484	16.3327	80.5225	13.6361	47.8269

## Sheet: Figure 2e
Figure 2e
		T0			2h			24h
	UBC	2.58689	2.75435	2.67572	2.84523	3.08074	2.92289	2.86681	2.63652	2.82016
	CD83	2.407	2.44765	2.61783	2.67393	2.73905	2.92125	2.78642	2.87991	2.83822
	CD40	1.76661	1.87919	1.94391	1.97226	2.36203	2.39884	2.23892	2.24542	2.33514
	IL15	1.37062	1.39505	1.52556	1.61054	1.73133	1.84509	1.87435	1.70635	1.88586
	UBE2S	1.4103	1.32079	1.3124	1.56886	1.57183	1.67487	1.27234	1.02318	1.19576
	SQSTM1	2.62396	2.75689	2.80914	2.7745	3.04999	2.97574	3.17743	2.84626	3.09624
	PSME2	1.98769	2.07787	2.09802	1.97497	2.2379	2.08124	2.4347	2.39641	2.43459
	ERAP2	1.03517	1.37586	1.12927	0.880817	1.11293	1.04559	1.58488	1.62295	1.45041
	TRIM21	0.783139	0.910515	0.978847	0.750314	1.12618	0.900621	1.19957	1.27155	1.27222
	TRIM22	0.697119	0.367918	0.768797	0.642624	-0.00846294	0.700831	1.31097	0.890157	0.865292

## Sheet: Figure 3c
Figure 3c
			-log(10) adjP
		Cellular response to hormone stimulus	3.22966
		Positive regulation of cell differentiation	2.69572
		Protein targeting to ER	5.53581
		Oxidative phosphorylation	3.92046
		Oxidative phosphorylation	4.81135
		Antigen processing and presentation	4.50224

## Sheet: Figure 4a
Figure 4a
			DEGs	H3K27Ac-DEGs
		Early response genes (2h)	33	284
		Late reponse genes (24h)	26	302

## Sheet: Figure 4d
Figure 4d		number of gene ontology terms in category	representative -log FDR p value
	antigen processing and presentation	3	7.129
	multi-organism cellular process	1	7.1524
	negative regulation of nitrogen compound metabolism	2	6.9318
	protein polyubiquitination	5	6.9957
	cell cycle	2	5.6861

## Sheet: Figure 5b
Figure 5b
			Steady-state LCs	Migrated LCs
			39.4	92.5
			2.89	95.8
			15.7	40
			1.76	67.2

[truncated: 9 more sheets: Figure 5c, Figure 6b, Figure 6d, Sup Fig 1c, Sup Fig 2b, Sup Fig 2e, Sup Fig 2f, Sup Fig 4a, Sup Fig 4d]
